# Supplementary material for: A convolutional neural network for steady state visual evoked potential classification under ambulatory environment
Source: PubMed Central journal article supplement (PMC5321422; doi:10.1371/journal.pone.0172578), 2017-02-22

(a) Input data samples of static SSVEPs

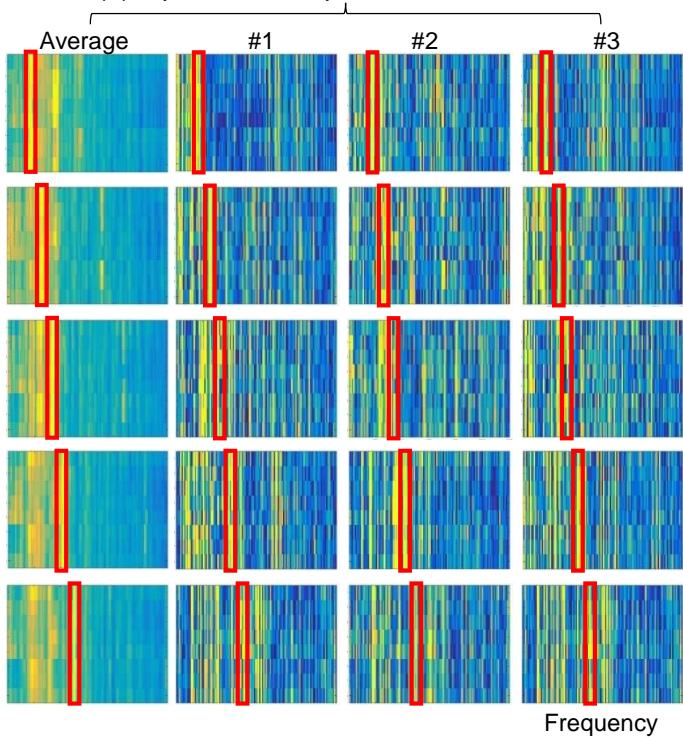

(b) Input data samples of ambulatory SSVEPs

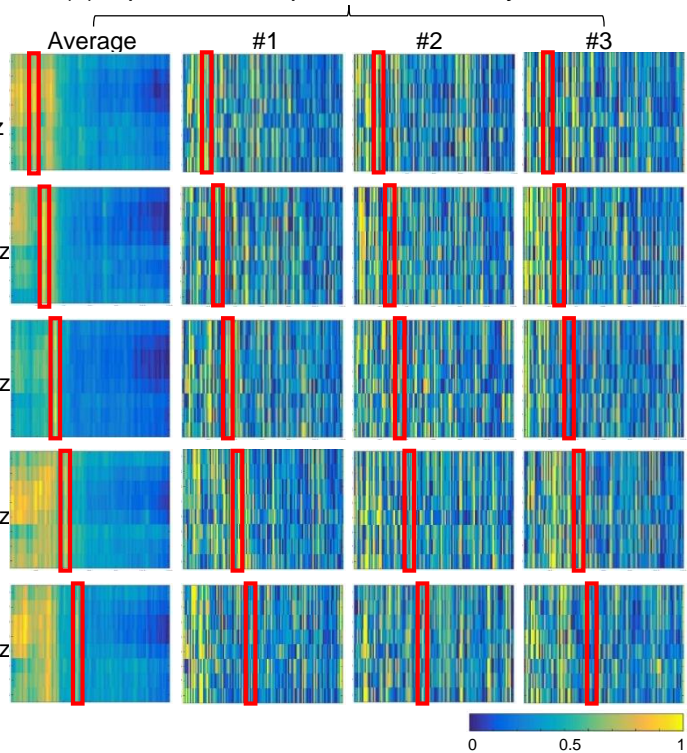

Supplement: pone.0172578.s001.pdf [file pone.0172578.s001.pdf]
