# Supplementary material for: A convolutional neural network for steady state visual evoked potential classification under ambulatory environment
Source: PubMed Central journal article supplement (PMC5321422; doi:10.1371/journal.pone.0172578), 2017-02-22
Supplement: pone.0172578.s002.pdf [file pone.0172578.s002.pdf]

(a) All subjects

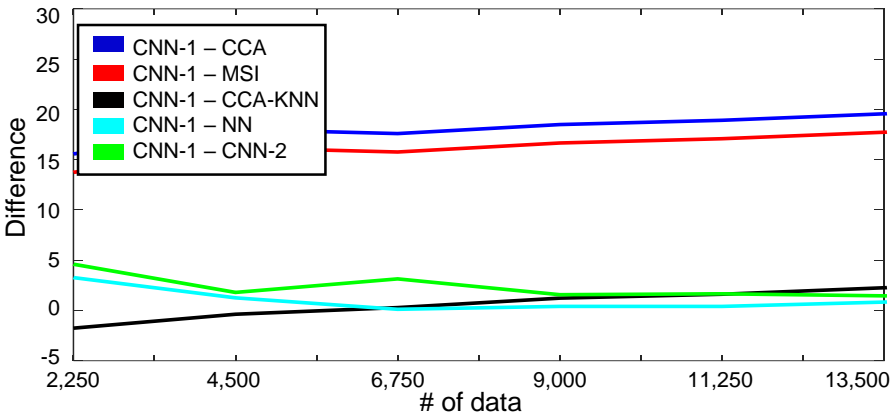

(b) Low-performing subject

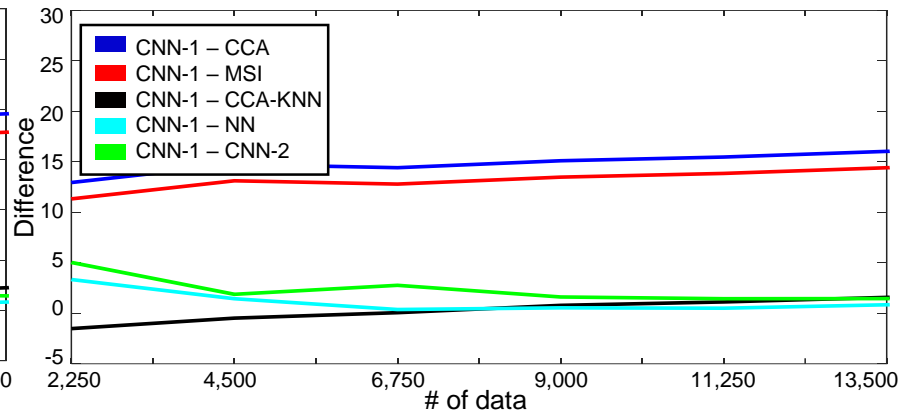

Performance differences with CNN-1 using static SSVEP

(c) All subjects

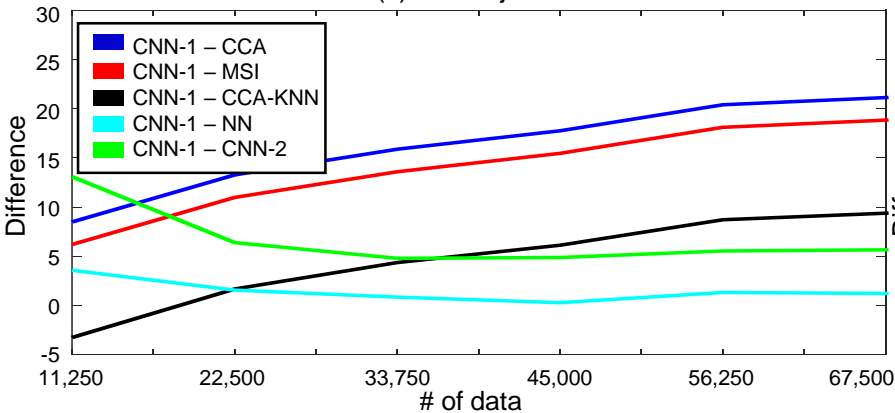

(d) Low-performing subject

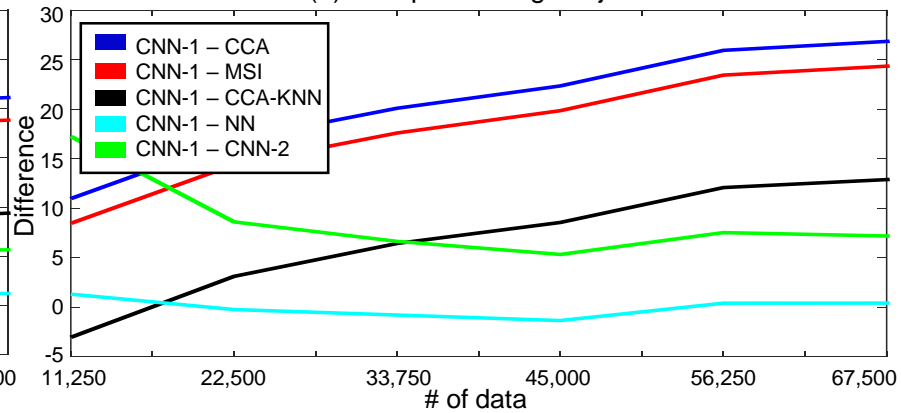

Performance differences with CNN-1 using ambulatory SSVEP
