# Supplementary material for: A convolutional neural network for steady state visual evoked potential classification under ambulatory environment
Source: PubMed Central journal article supplement (PMC5321422; doi:10.1371/journal.pone.0172578), 2017-02-22

# Kernels obtained with CNN-2 in $C_1$ (left) and $C_2$ (right) layers for subject S2 (top) and S3 (bottom)

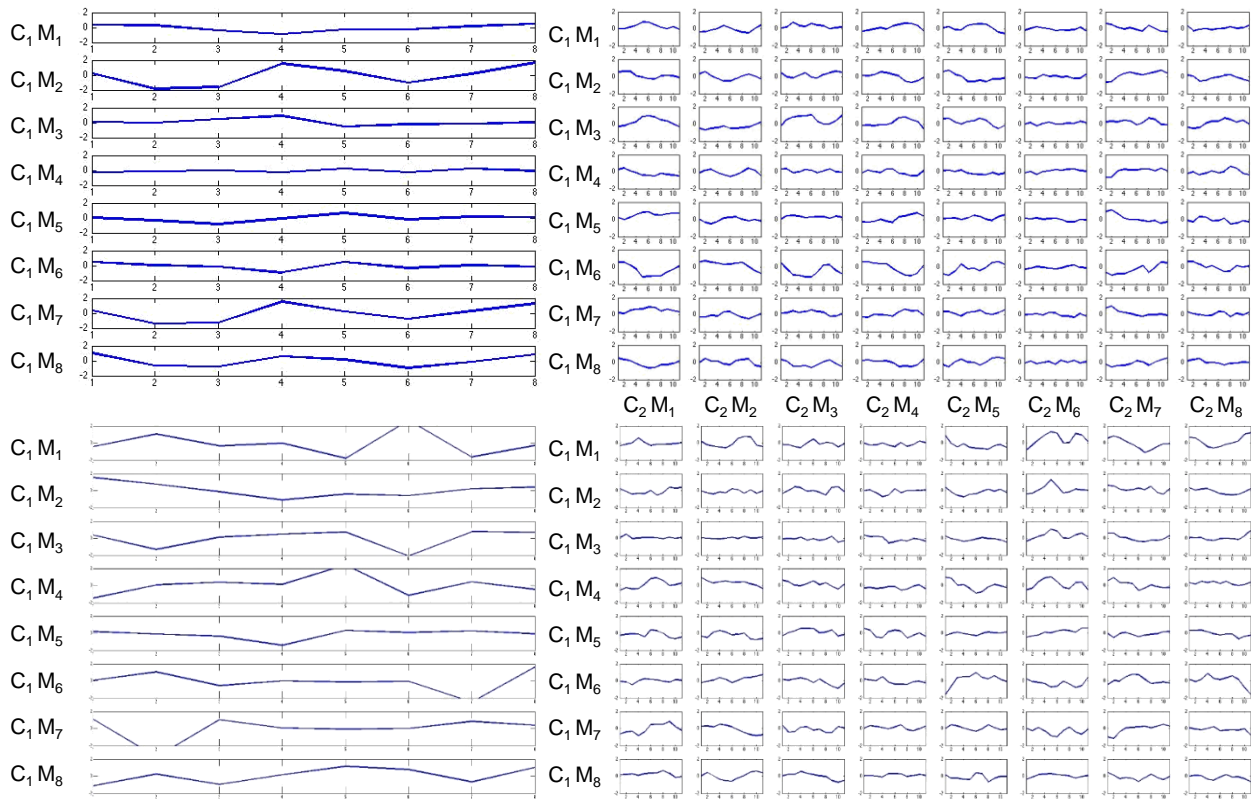

Supplement: pone.0172578.s003.pdf [file pone.0172578.s003.pdf]
